# Supplementary material
Source: PubMed Central journal article supplement (PMC3144063)
Supplement: supp_0022034509352151_JDR352151_Appendix_updated.pdf [file supp_0022034509352151_JDR352151_Appendix_updated.pdf]

## RESEARCH REPORTS

### Biomaterials & Bioengineering

W.-W. Hu<sup>1,2</sup>, B.B. Ward<sup>3</sup>, Z. Wang<sup>1</sup>, and P.H. Krebsbach<sup>1\*</sup>

<sup>1</sup>Department of Biologic and Materials Sciences and <sup>3</sup>Department of Oral and Maxillofacial Surgery, School of Dentistry, K1030, 1011 N. University Ave., University of Michigan, Ann Arbor, MI 48109, USA; and <sup>2</sup>Department of Chemical and Materials Engineering, National Central University, Chungli 320, Taiwan; \*corresponding author, paulk@umich.edu

*J Dent Res* 89(1):77-81, 2010

# Bone Regeneration in Defects Compromised by Radiotherapy

## APPENDIX

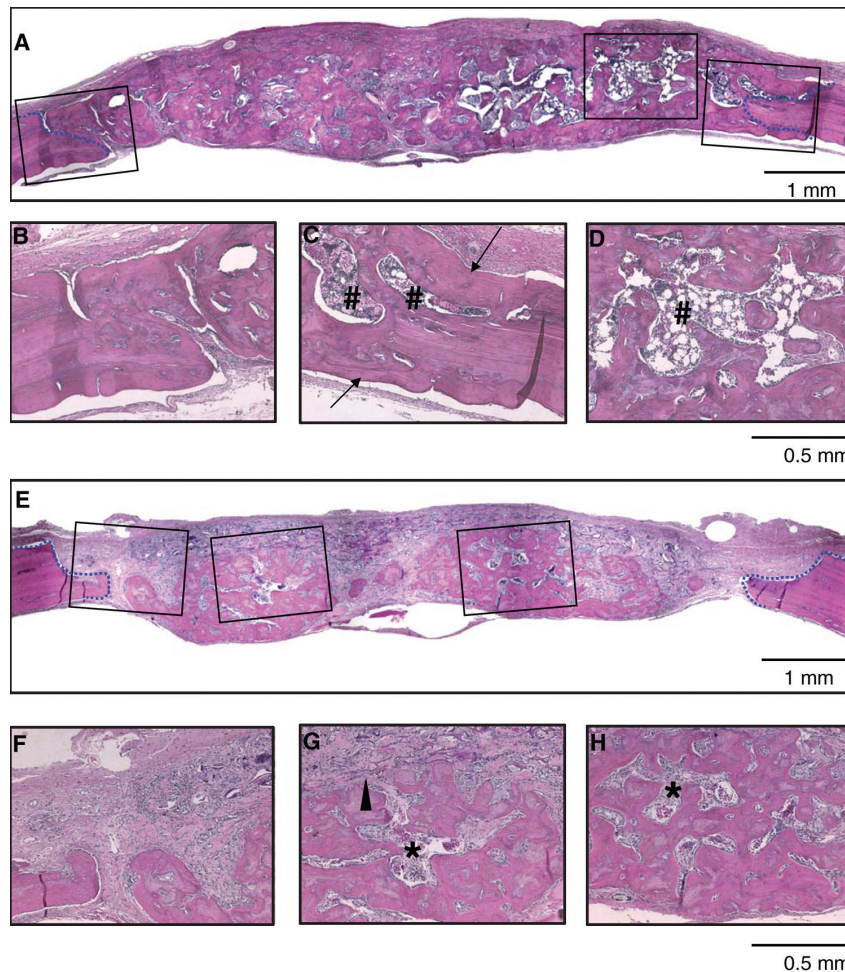

**Appendix Figure.** Histological analysis of critical-sized calvarial defects with or without pre-operative radiation therapy. Sections were prepared from the midline of defects. The defects without (A-D) and with (E-H) radiation treatment were examined. The defect margins are depicted by blue dashed lines. Original magnifications: (A, E) X40; (B-D, F-H) X100. Arrow, lamellar bone; arrowhead, undegraded gelatin sponges; #mature bone marrow with adipose tissues; \*immature bone marrow.
